# Supplementary material for: ROMANA 3: a phase 3 safety extension study of anamorelin in advanced non-small-cell lung cancer (NSCLC) patients with cachexia
Source: PubMed Central journal article supplement — Ann Oncol. 2017 May 4;28(8):1949–56. doi: 10.1093/annonc/mdx192 (PMC5834076; doi:10.1093/annonc/mdx192), 2017-05-04
Supplement: supplementary_figure_s1_3apr2017_mdx192.pdf [file supplementary_figure_s1_3apr2017_mdx192.pdf]

# Supplementary Figure S1

## Change from baseline overall in body weight (kg) by subgroup – ITT population

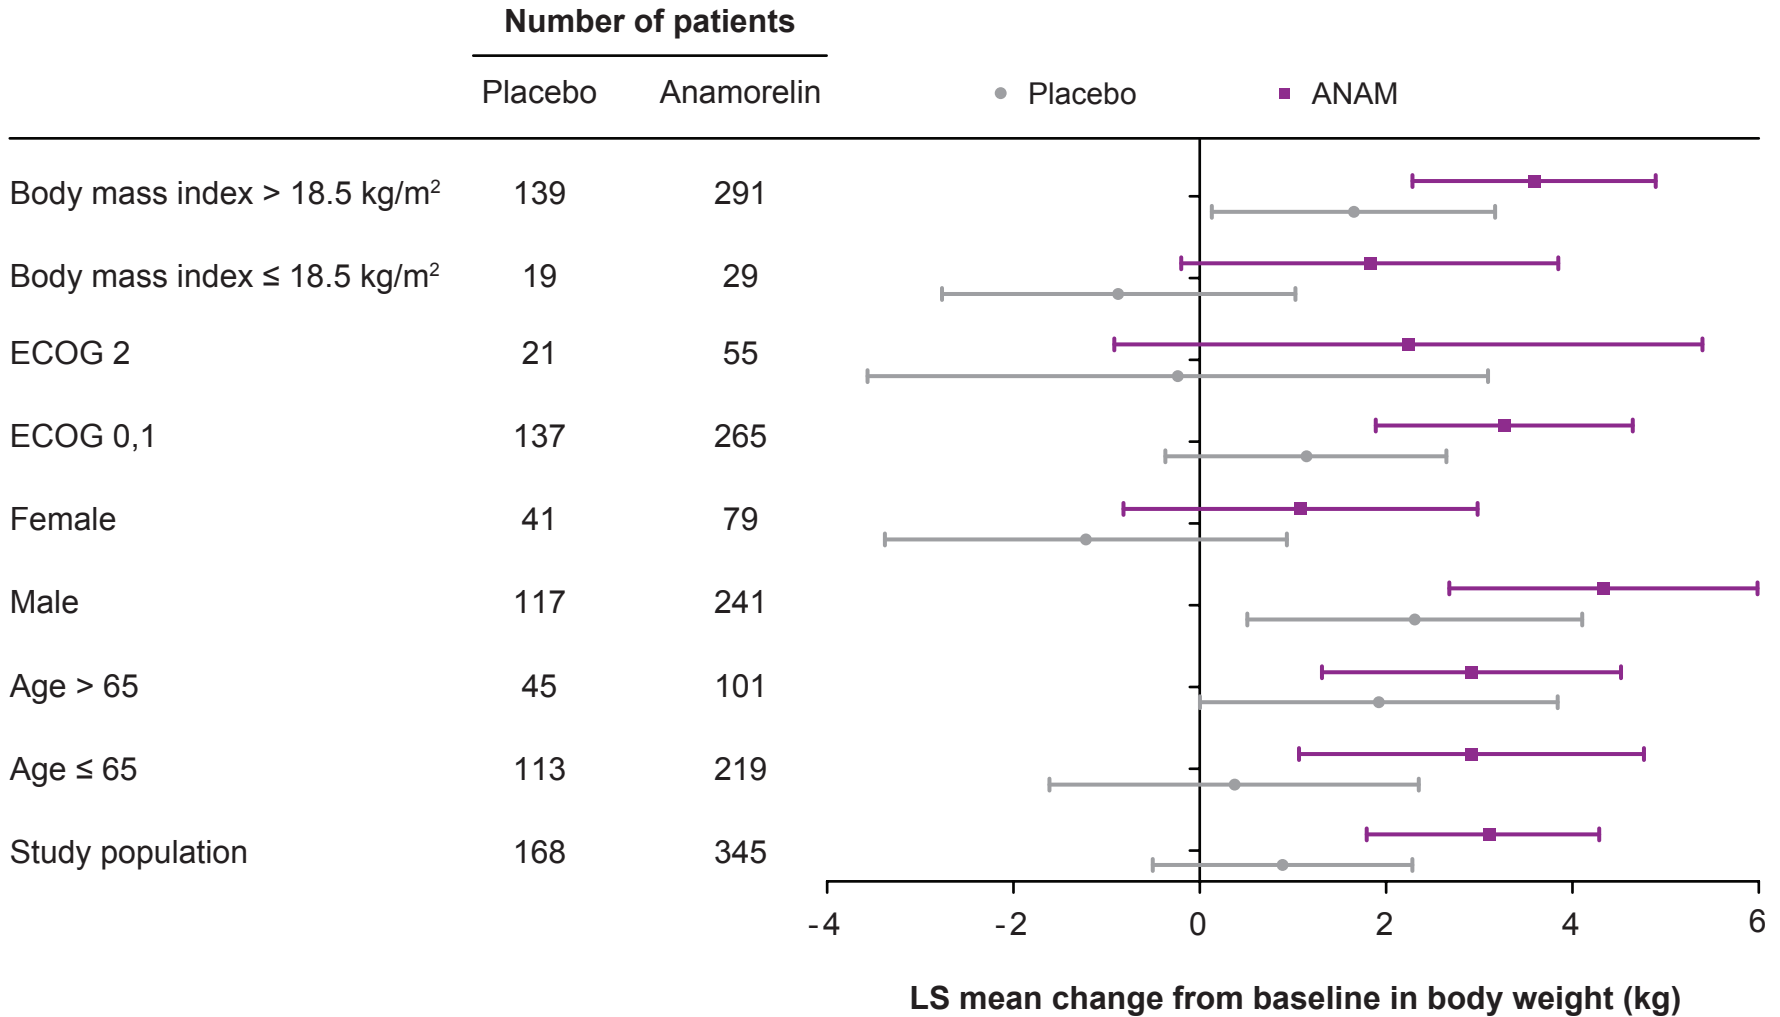

The results are displayed as LS mean change from baseline over 24 weeks and 95% CI.
