# Supplementary figures and images for: ROMANA 3: a phase 3 safety extension study of anamorelin in advanced non-small-cell lung cancer (NSCLC) patients with cachexia
Source: PubMed Central journal article supplement — Ann Oncol. 2017 May 4;28(8):1949–56. doi: 10.1093/annonc/mdx192 (PMC5834076; doi:10.1093/annonc/mdx192), 2017-05-04

# Supplementary Figure S3

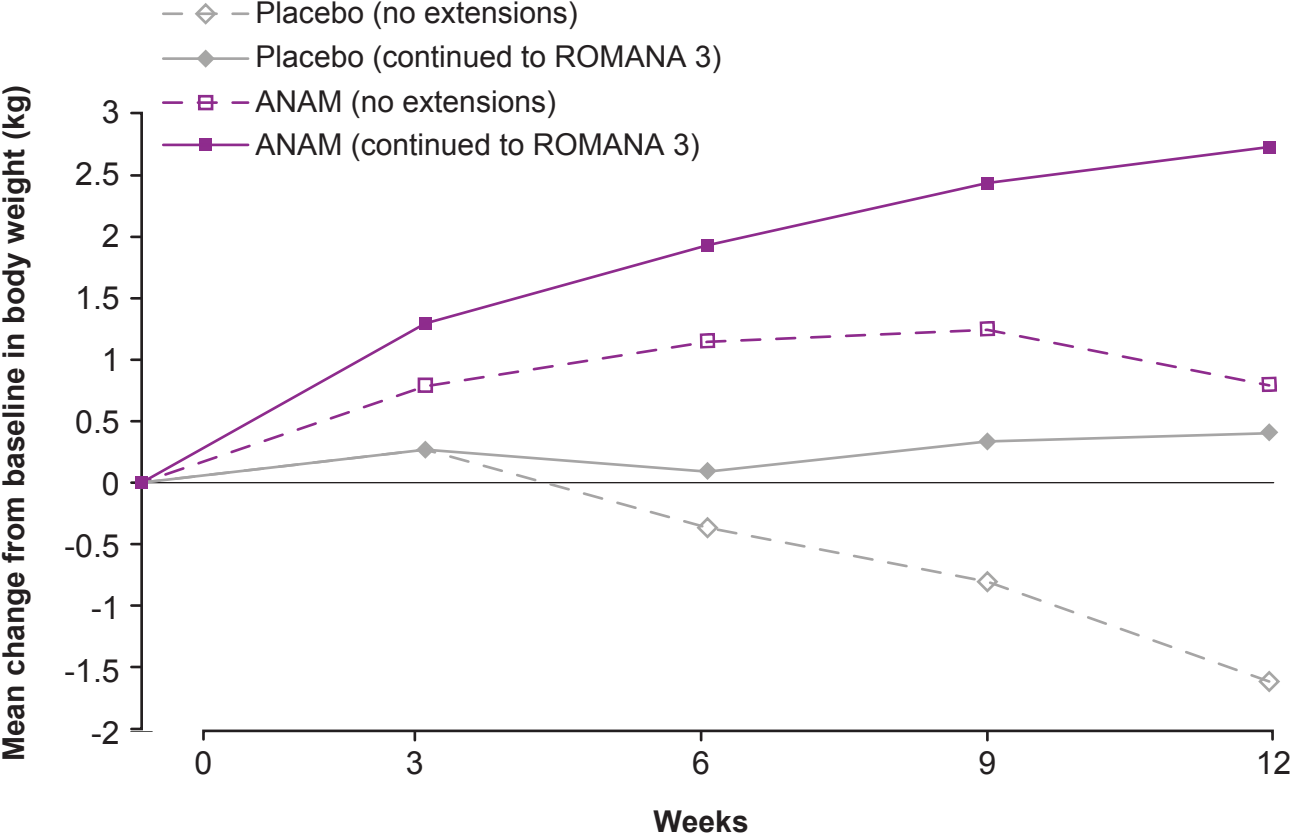

Supplement: supplementary_figure_s3_3apr2017_mdx192.pdf [file supplementary_figure_s3_3apr2017_mdx192.pdf]
